# Supplementary material for: Molecular Epidemiology of Carbapenem-Resistant Klebsiella aerogenes in Japan
Source: MDPI journal article supplement (doi:10.3390/ijms25084494), 2024-04-19
Supplement: s1 [file s1]

**Table S3.** Domestic and international representative integrons harboring *bla*<sub>IMP-1</sub> and *bla*<sub>IMP-6</sub> referenced in our Study.

| Carbapenemase | Species                        | Integron structure including gene cassettes                                         | Integron no. | Country | Genbank accession no. |
|---------------|--------------------------------|-------------------------------------------------------------------------------------|--------------|---------|-----------------------|
| IMP-1         | <i>Escherichia coli</i>        | intI1-aacA1- <i>bla</i> <sub>IMP-1</sub> -Emr-qacE-sul1                             | In798        | Japan   | LC720959              |
|               | <i>Klebsiella pneumoniae</i>   | intI1-aacA4- <i>bla</i> <sub>IMP-1</sub> -aadA2-Tnp-qacE-sul1                       | In1311       | Japan   | LC169566              |
|               | <i>Citrobacter freundii</i>    | intI1- <i>bla</i> <sub>IMP-1</sub> -aacA31- <i>bla</i> <sub>OXA142</sub> -qacE-sul1 | In1312       | Brazil  | LC169567              |
|               | <i>Klebsiella pneumoniae</i>   | intI1- <i>bla</i> <sub>IMP-1</sub> -ORF-aacA4-aadA6-Tnp                             | In1223       | China   | KT345947              |
|               | <i>Enterobacter hormaechei</i> | intI1- <i>bla</i> <sub>IMP-1</sub> -aacA4-cr-sul1-ORF                               | In1426       | Japan   | AP018351              |
| IMP-6         | <i>Klebsiella pneumoniae</i>   | intI1-aacA4- <i>bla</i> <sub>IMP-6</sub> -aadA2-Tnp-qacE-sul1                       | In1321       | Japan   | LC169589              |
|               | <i>Klebsiella pneumoniae</i>   | intI1-aacA4- <i>bla</i> <sub>IMP-6</sub> -aadA2-Tnp-qacE-sul1                       | In1547       | Japan   | AP019404              |
|               | <i>Escherichia coli</i>        | intI1-aacA4- <i>bla</i> <sub>IMP-6</sub> -aadA2-qacE-sul1                           | In1690       | Japan   | LC720960              |
|               | <i>Klebsiella pneumoniae</i>   | s. a                                                                                | In1690       | Japan   | AP019402              |
|               | <i>Klebsiella aerogenes</i>    | s. a                                                                                | In1690       | Japan   | AP019272              |

EMR stands for a efflux-mediated small multidrug resistance (SMR) transporter. The transposases (Tnp) of In1321 and In1547 differ from each other, and the alleles of adenine and thymine at position 368 of the *aacA4* gene also vary. To maintain consistency with original citations, what were previously named *aac(6')*-Ib are here referred to as *aacA4*. The three integrons in In1690 are identical, thus abbreviated as "Same as above" (s.a.).
