# Supplementary material for: Molecular Epidemiology of Carbapenem-Resistant Klebsiella aerogenes in Japan
Source: MDPI journal article supplement (doi:10.3390/ijms25084494), 2024-04-19
Supplement: s1 [file s1]

**Table S2.** Antimicrobial resistance genes and mobile genetic genes in this study.

| Abbreviation                  | Name or function of each gene                                            |
|-------------------------------|--------------------------------------------------------------------------|
| <i>aadA2</i>                  | Aminoglycoside adenylyltransferase type 2                                |
| <i>aac(6')-Ib (aacA4)</i>     | Aminoglycoside 6'-N-acetyltransferase type Ib                            |
| <i>aph(3')-XV</i>             | Aminoglycoside phosphotransferase (3')-XV                                |
| <i>bla</i> <sub>CTX-M-2</sub> | CTX-M-2 type $\beta$ -lactamase gene                                     |
| <i>bla</i> <sub>OXA-101</sub> | Oxacillinase-101 gene                                                    |
| <i>bla</i> <sub>SHV-190</sub> | SHV-190 extended Spectrum beta( $\beta$ )-Lactamase gene                 |
| <i>ble</i>                    | Bleomycin resistance gene                                                |
| <i>dfrA14</i>                 | Quinolone resistance gene                                                |
| <i>dsbD</i>                   | Disulfide bond protein family D gene                                     |
| <i>fosA7</i>                  | Fosfomycin resistance gene                                               |
| IS5                           | Insertion Sequence element, IS5 family                                   |
| IS3000                        | Insertion Sequence element, Tn3 family                                   |
| ISAbal25                      | Insertion Sequence element, IS30 family                                  |
| ISKox3                        | Insertion Sequence element, ICL3 family                                  |
| ISVsa10                       | Insertion Sequence element, IS91 family                                  |
| ORF                           | A sequence of DNA that has the potential to be translated into a protein |
| <i>oqxA</i>                   | Quinolone resistance gene                                                |
| <i>qnrS1</i>                  | Quinolone resistance gene                                                |
| <i>sul1</i>                   | Sulfonamide resistance gene 1                                            |
| <i>tet(A)</i>                 | Tetracycline resistance gene                                             |
| Tn2                           | Transposase, Tn3 family                                                  |
| Tn5403                        | Transposase, Tn3 family                                                  |
| <i>trpF</i>                   | N-(5'-phosphoribosyl)anthranilate isomerase                              |
