# Supplementary material for: Molecular Epidemiology of Carbapenem-Resistant Klebsiella aerogenes in Japan
Source: MDPI journal article supplement (doi:10.3390/ijms25084494), 2024-04-19
Supplement: s1 [file s1]

**Table S1.** Drug sensitivity test results for carbapenemase-producing *Klebsiella aerogenes*.

| Bacterial strains             | TUT0013                                             | TUT0015 | TUT0023 | TUT0032 | TUT0037 | TUT0049 |
|-------------------------------|-----------------------------------------------------|---------|---------|---------|---------|---------|
| Antimicrobial drugs           | Antibiotic Minimum Inhibitory Concentration (µg/mL) |         |         |         |         |         |
| Piperacillin                  | ≥128                                                | –       | ≥128    | ≥128    | ≥128    | ≥128    |
| Tazobactam/piperacillin       | =32                                                 | ≤16     | ≤16     | ≤16     | –       | ≥128    |
| Cefmetazole                   | ≥64                                                 | –       | ≥64     | ≥64     | ≥64     | ≥64     |
| Ceftriaxone                   | ≥4                                                  | ≥4      | ≥4      | ≥4      | –       | ≥4      |
| Cefepime                      | ≤2                                                  | –       | ≥32     | ≥32     | ≥32     | ≥32     |
| Meropenem                     | ≥4                                                  | ≥4      | ≥4      | ≥4      | –       | ≥4      |
| Imipenem/Cilastatin           | =2                                                  | –       | –       | –       | ≥4      | –       |
| Azactam                       | ≤4                                                  | –       | ≥16     | ≥16     | ≤4      | ≤4      |
| Gentamicin                    | ≤2                                                  | –       | ≤2      | ≤2      | ≤2      | ≤2      |
| Amikacin                      | ≤4                                                  | –       | –       | –       | ≤4      | ≤4      |
| Fosmicin                      | ≤4                                                  | =16     | =16     | ≥32     | ≤4      | ≤4      |
| Levofloxacin                  | ≤0.5                                                | =1      | ≤0.5    | ≤0.5    | ≤0.5    | ≤0.5    |
| Trimethoprim/Sulfamethoxazole | ≤38                                                 | –       | ≥76     | ≤38     | ≤38     | ≤38     |

\*Each number represents Breakpoint and MIC values. A dash indicates not measured.
